# Supplementary material for: Preparation of photo-cross-linked pH-responsive polypeptide nanogels as potential carriers for controlled drug delivery
Source: Royal Society of Chemistry journal article supplement (doi:10.1039/c1jm10391a), 2011-01-01
Supplement: c1jm10391a.pdf [file c1jm10391a.pdf]

## Supporting Information

# Preparation of photo-cross-linked pH-responsive polypeptide nanogels as potential carriers for controlled drug delivery

Jianxun Ding,<sup>a,b</sup> Xiuli Zhuang,<sup>a</sup> Chunsheng Xiao,<sup>a,b</sup> Yilong Cheng,<sup>a,b</sup> Li Zhao,<sup>a,b</sup> Chaoliang He,<sup>a</sup> Zhaohui Tang,<sup>a</sup> and Xuesi Chen\*<sup>a</sup>

<sup>a</sup> Key Laboratory of Polymer Ecomaterials, Changchun Institute of Applied Chemistry, Chinese Academy of Sciences, Changchun 130022, P. R. China. E-mail: xschen@ciac.jl.cn, Tel/Fax: +86-431-8526-2112

<sup>b</sup> Graduate University of Chinese Academy of Sciences, Beijing 100039, P. R. China

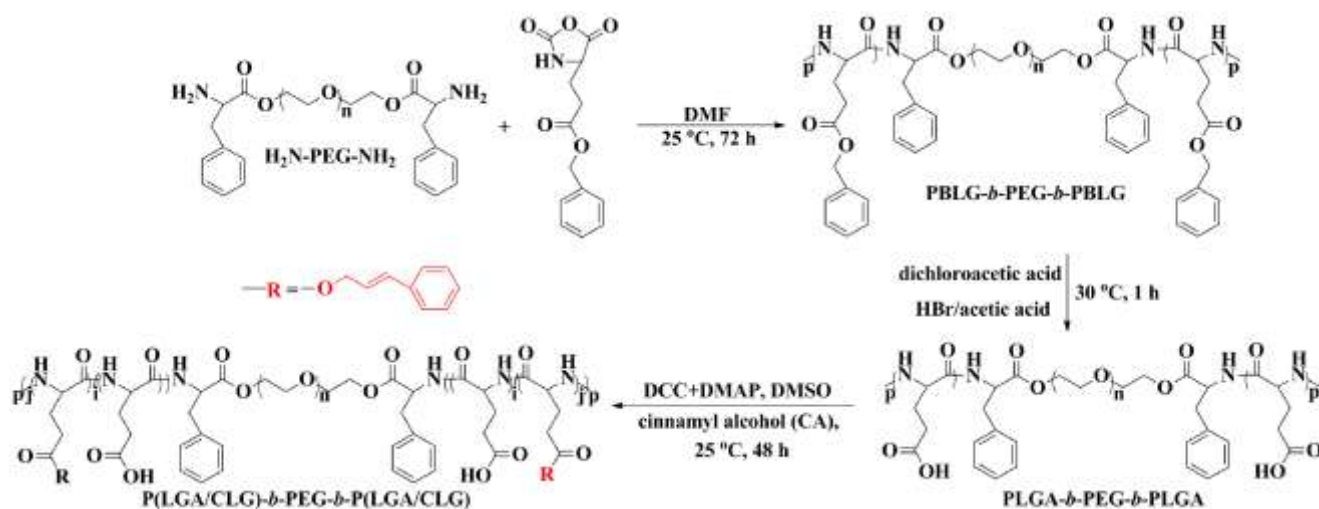

**Scheme S1** Synthesis procedure for P(LGA/CLG)-*b*-PEG-*b*-P(LGA/CLG).

### Synthesis of amino group terminated poly(ethylene glycol) monomethyl ether (mPEG-NH<sub>2</sub>) and poly(ethylene glycol) (H<sub>2</sub>N-PEG-NH<sub>2</sub>) macroinitiator

mPEG<sub>113</sub>-NH<sub>2</sub> and H<sub>2</sub>N-PEG<sub>104</sub>-NH<sub>2</sub> were synthesized by condensation reaction with dicyclohexylcarbodiimide (DCC)/4-*N,N*-dimethylaminopyridine (DMAP) as the coupling reagents and then the deprotection of *tert*-butoxycarbonyl (*t*-Boc) group as depicted in Scheme S2. Briefly, mPEG ( $M_n = 5000$ , 10.0 g, 2.0 mmol), *N*-(*tert*-Butoxycarbonyl)-L-phenylalanine (0.53 g, 2.0 mmol) and DMAP (24.43 mg, 0.2 mmol) were dissolved in 50 mL dry methylene chloride (CH<sub>2</sub>Cl<sub>2</sub>) in a flame-dry flask, then DCC (2.06 g, 10.0 mmol) in CH<sub>2</sub>Cl<sub>2</sub> was added slowly to the solution with stirring and the reaction was conducted at room temperature for 48 h. The by-product dicyclohexylurea (DCU) precipitate was removed by filtration. Then, the solution was precipitated into excessive diethyl ether. The obtained product was further washed twice with diethyl ether and dried under vacuum at room temperature for 24 h (Yield: 96%). Subsequently, mPEG-NH-*t*-Boc (9.0 g, 1.72 mmol) was dissolved in 50 mL tetrahydrofuran (THF) at 25 °C in a flask. After 10 mL HCl/THF saturated solution was added, the solution was slowly stirred at 25 °C for 2 h and then the final product was precipitated into excessive diethyl ether and washed twice with diethyl ether. The precipitate was collected and dried under vacuum to a constant weight at room temperature. The yield was approximately 97%. The chemical structure of mPEG<sub>113</sub>-NH<sub>2</sub> and H<sub>2</sub>N-PEG<sub>104</sub>-NH<sub>2</sub> were characterized by <sup>1</sup>H NMR and <sup>13</sup>C NMR, as shown in Fig. S1 and S2.

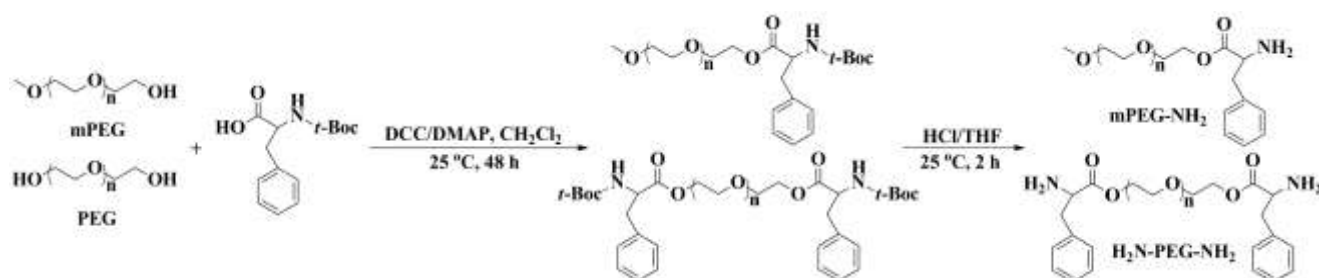

**Scheme S2** Synthesis procedures for mPEG-NH<sub>2</sub> and H<sub>2</sub>N-PEG-NH<sub>2</sub>.

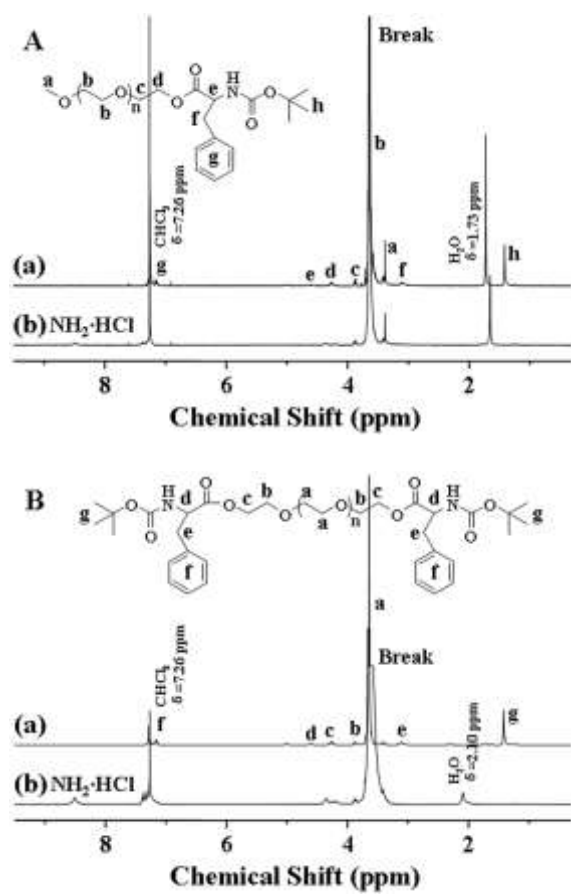

Fig. S1  $^1\text{H}$  NMR of macroinitiators before (a) and after (b) deprotection, mPEG<sub>113</sub> (A), and PEG<sub>104</sub> (B) (in  $\text{CDCl}_3$ ).

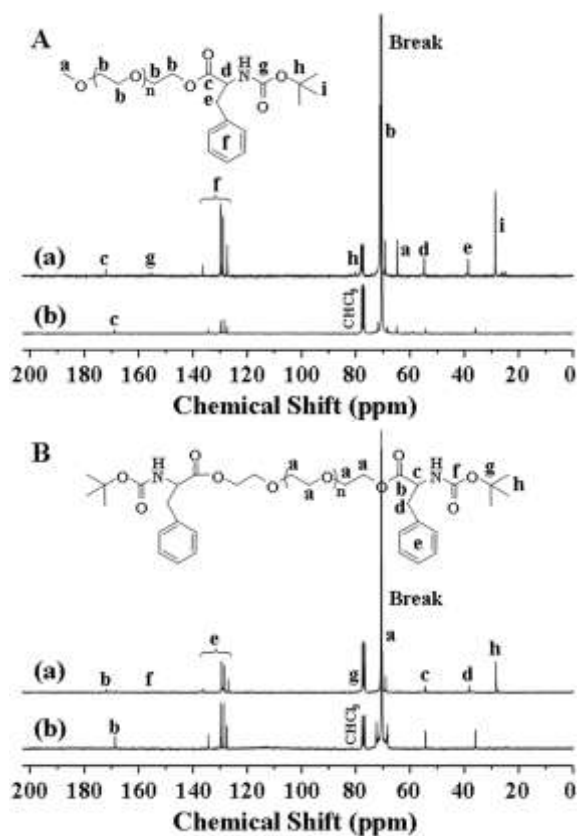

Fig. S2  $^{13}\text{C}$  NMR of macroinitiators before (a) and after (b) deprotection,  $\text{mPEG}_{113}$  (A), and  $\text{PEG}_{104}$  (B) (in  $\text{CDCl}_3$ ).

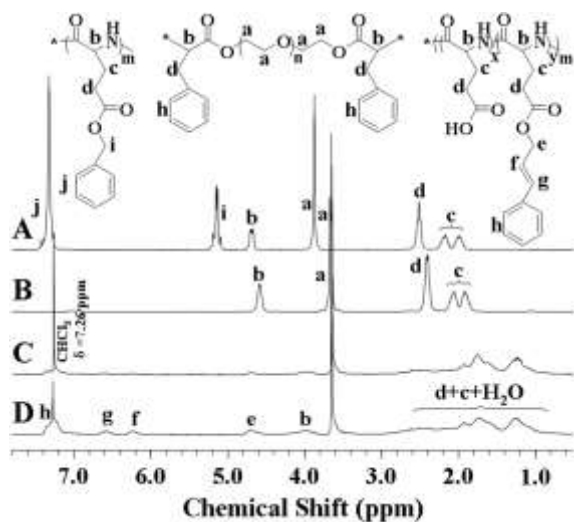

Fig. S3  $^1\text{H}$  NMR spectra of  $\text{PBLG}_{106}\text{-}b\text{-PEG}_{104}\text{-}b\text{-PBLG}_{106}$  (A),  $\text{PLG}_{106}\text{-}b\text{-PEG}_{104}\text{-}b\text{-PLG}_{106}$  (B),  $\text{P(LGA}_{87}\text{/CLG}_{19})\text{-}b\text{-PEG}_{104}\text{-}b\text{-P(LGA}_{87}\text{/CLG}_{19})$  **2** (C) and  $\text{P(LGA}_{68}\text{/CLG}_{38})\text{-}b\text{-PEG}_{104}\text{-}b\text{-P(LGA}_{68}\text{/CLG}_{38})$  **3** (D) (in  $\text{CF}_3\text{COOD}+\text{CDCl}_3$  (1/1, v/v) for (A),  $\text{CF}_3\text{COOD}$  for (B), and  $\text{CDCl}_3$  for (C) and (D)).

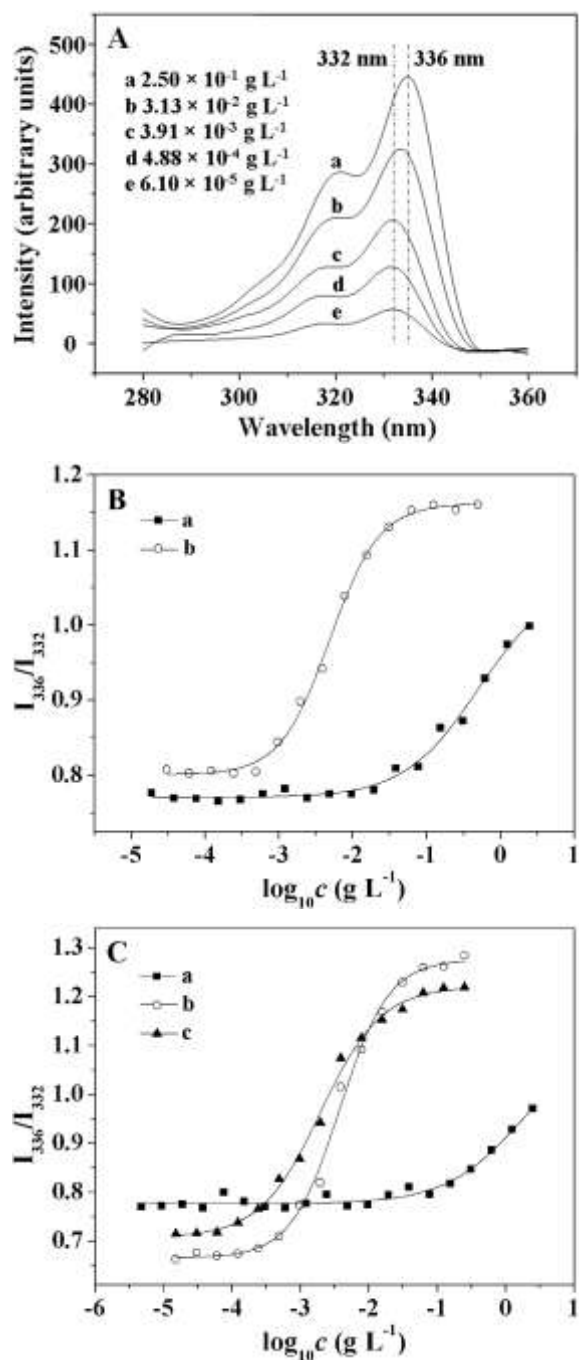

**Fig. S4** Excitation spectra of pyrene in aqueous solution of mPEG<sub>113</sub>-b-P(LGA<sub>73</sub>/CLG<sub>37</sub>) at different concentrations ( $\lambda_{\text{em}} = 390 \text{ nm}$ ) (A), the intensity ratio ( $I_{336}/I_{332}$ ) as a function of concentration of mPEG<sub>113</sub>-b-PLGA<sub>110</sub> (a) and mPEG<sub>113</sub>-b-P(LGA<sub>73</sub>/CLG<sub>37</sub>) (b) (B), and PLGA<sub>106</sub>-b-PEG<sub>104</sub>-b-PLGA<sub>106</sub> (a), P(LGA<sub>87</sub>/CLG<sub>19</sub>)-b-PEG<sub>104</sub>-b-P(LGA<sub>87</sub>/CLG<sub>19</sub>) (b) and P(LGA<sub>68</sub>/CLG<sub>38</sub>)-b-PEG<sub>104</sub>-b-P(LGA<sub>68</sub>/CLG<sub>38</sub>) (c) (C).

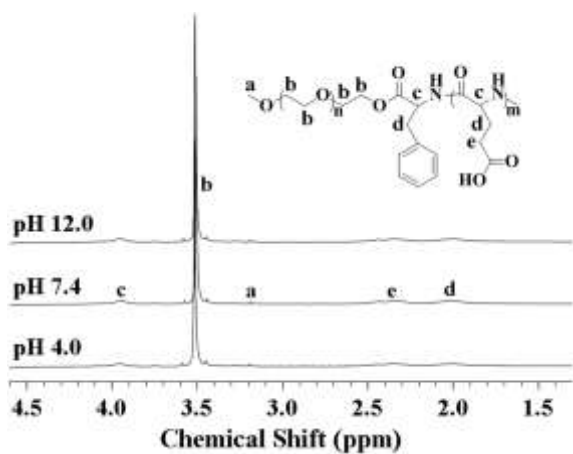

**Fig. S5**  $^1\text{H}$  NMR spectra of  $\text{mPEG}_{113}\text{-}b\text{-PLGA}_{110}$  at pH 4.0, 7.4, and 12.0 (in  $\text{D}_2\text{O}$ ).

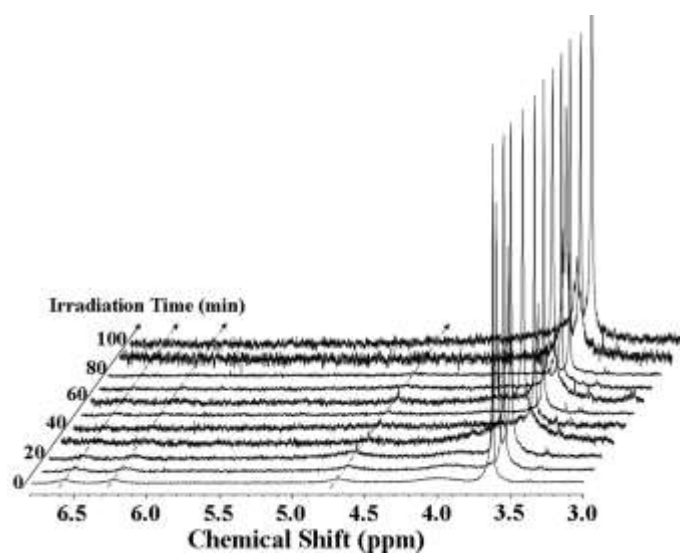

**Fig. S6** Change in the  $^1\text{H}$  NMR spectra of  $\text{mPEG}_{113}\text{-}b\text{-P(LGA}_{73}\text{/CLG}_{37})$  **1** as a function of irradiation time (in  $\text{CDCl}_3$ ) (nanogels were prepared in aqueous solution at pH 7.4).

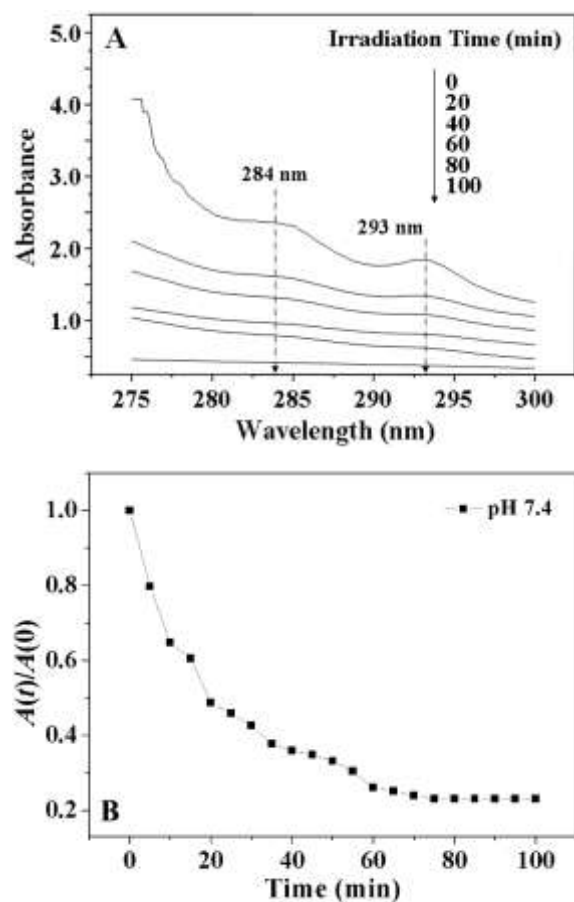

**Fig. S7** UV-vis spectra of P(LGA<sub>87</sub>/CLG<sub>19</sub>)-*b*-PEG<sub>104</sub>-*b*-P(LGA<sub>87</sub>/CLG<sub>19</sub>) aqueous solution of 0.5 g L<sup>-1</sup> at pH 7.4 subjected to UV irradiation at  $\lambda = 254$  nm as a function of irradiation time (A), decrease in  $A(t)/A(0)$  for the cinnamyl residues determined from the UV-vis absorption spectra at pH 7.4 plotted as a function of irradiation time (B).

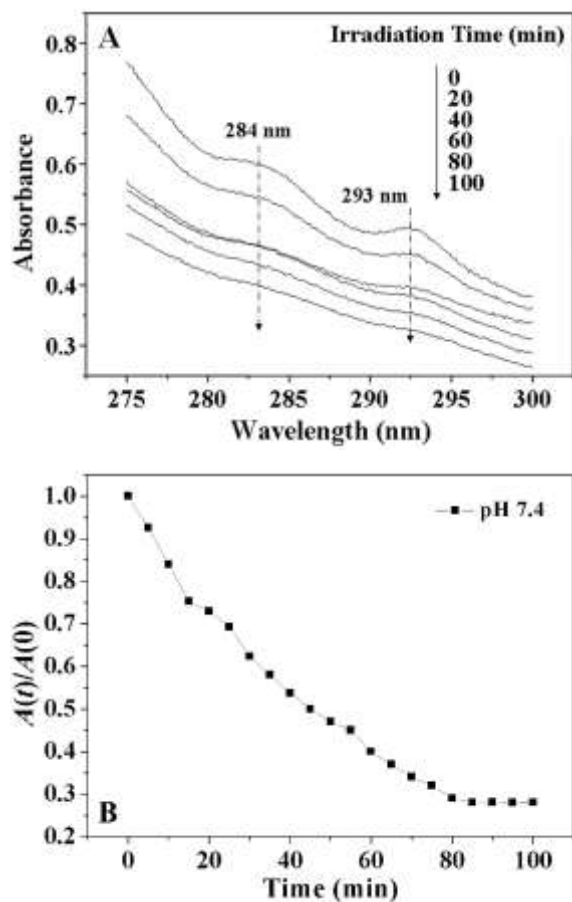

**Fig. S8** UV-vis spectra of  $P(LGA_{68}/CLG_{38})-b-PEG_{104}-b-P(LGA_{68}/CLG_{38})$  aqueous solution of  $0.5 \text{ g L}^{-1}$  at pH 7.4 subjected to UV irradiation at  $\lambda = 254 \text{ nm}$  as a function of irradiation time (A), decrease in  $A(t)/A(0)$  for the cinnamyl residues determined from the UV-vis absorption spectra at pH 7.4 plotted as a function of irradiation time (B).

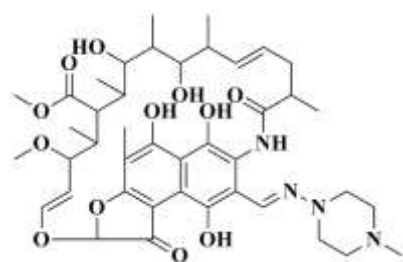

**Scheme S3** Chemical structure of rifampin.

The rifampin chemical structure was used to explain the release behavior as an ancillary factor.
